# Supplementary material for: Control of human cytomegalovirus replication by liver resident natural killer cells
Source: Springer Nature journal article supplement (doi:10.1038/s41467-023-37181-w), 2023-03-14
Supplement: MOESM1 [file 41467_2023_37181_MOESM1_ESM.pdf]

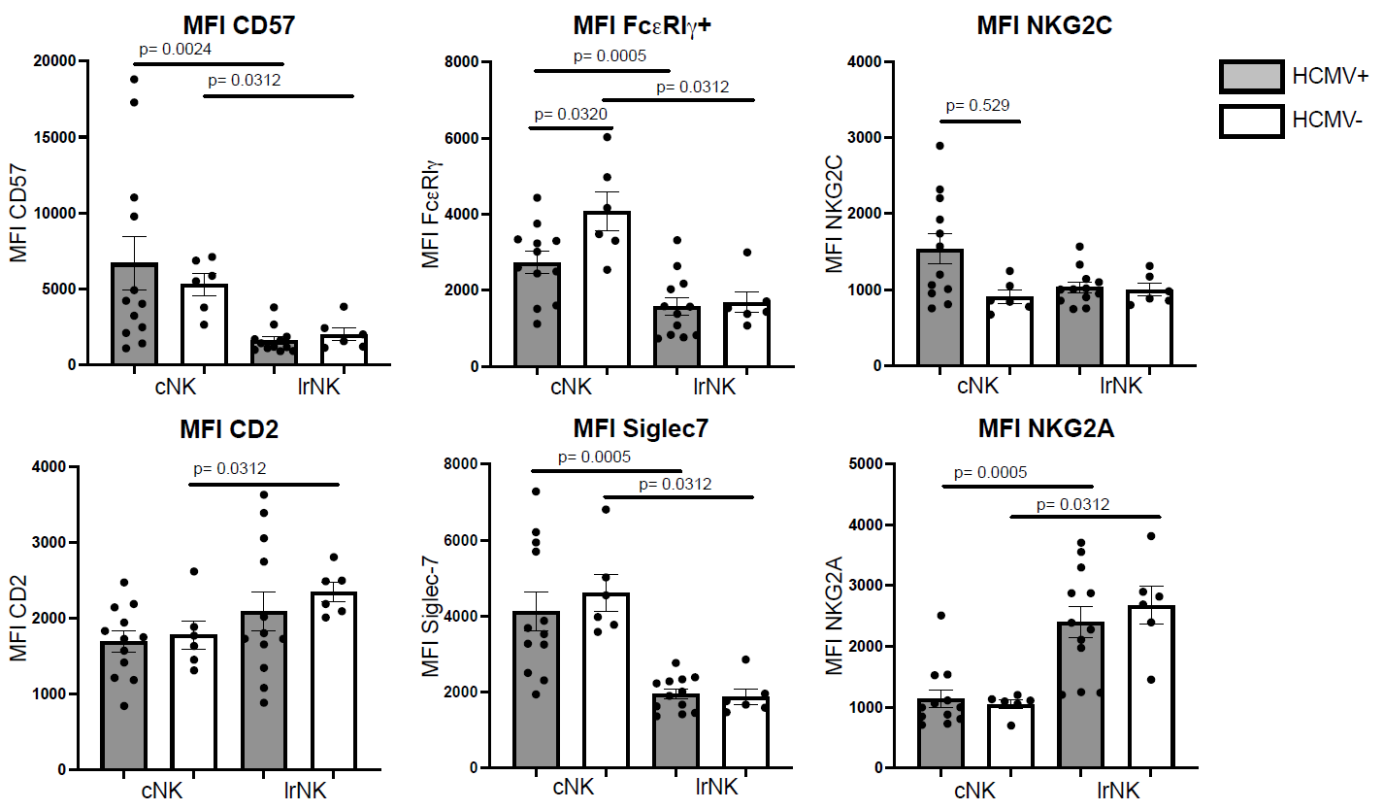

**Figure S1. Expression phenotype of cNK or LrNK cells from HCMV seropositive or seronegative individuals.** cNK and LrNK from HCMV seropositive (grey bars; n= 12) and seronegative (clear bars; n= 6) donors were analysed for their MFI expression of CD57, CD2, FcεRIγ, Siglec7, NKG2C, NKG2A. Significance was assessed using 2-tailed Wilcoxon's signed-rank sum test (paired data) or a 2-tailed Mann-Whitney U test (unpaired data) with P values less than 0.05 considered significant. Source Data are provided as a Source Data file.

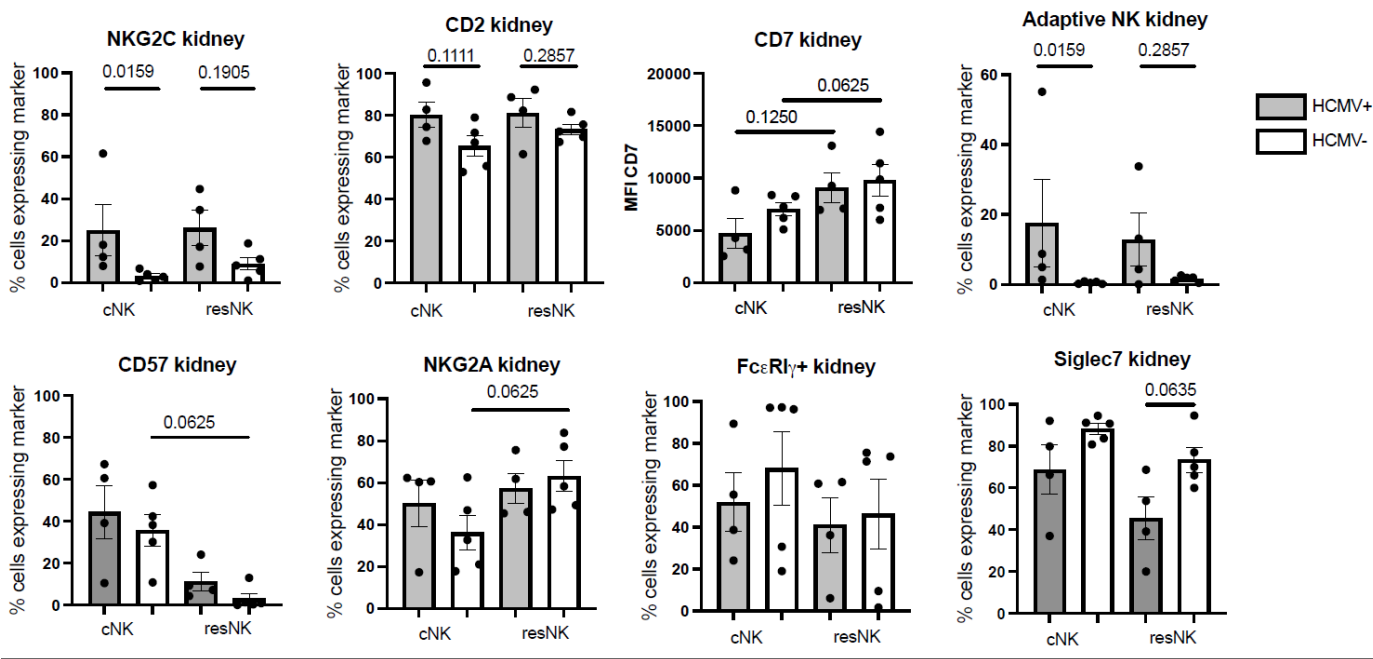

**Figure S2. Expression phenotype observed in liver is recapitulated in the kidney.** cNK and kidney-resident NK (krNK) from HCMV seropositive (grey bars; n= 4) and seronegative (clear bars; n= 5) donors were analysed for their MFI expression of CD57, CD2, FcεRIγ, Siglec7, NKG2C, NKG2A, and CD7. Significance was assessed using 2-tailed Wilcoxon's signed-rank sum test (paired data) or a 2-tailed Mann-Whitney U test (unpaired data) with P values less than 0.05 considered significant. Source Data are provided as a Source Data file.

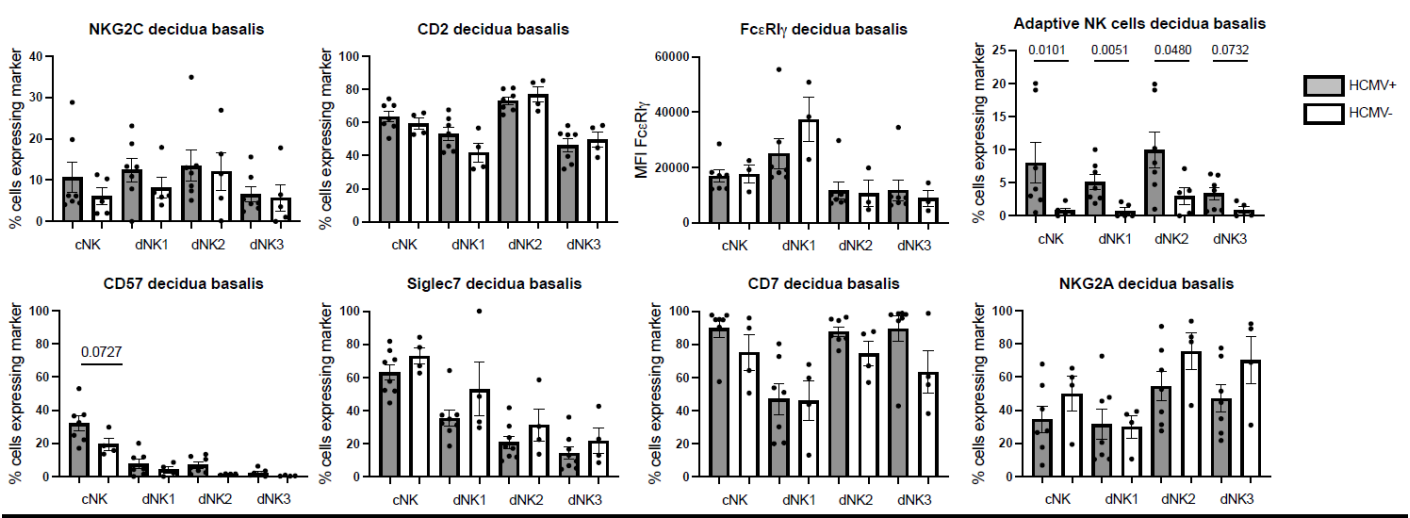

**Figure S3. Expression phenotype of decidual NK cells from HCMV seropositive or seronegative individuals.** Decidual NK cells from HCMV seropositive (grey bars; n= 7) and seronegative (clear bars; n= 5) were analysed for their MFI expression of CD57, CD2, FcεRIγ, Siglec7, NKG2C, NKG2A, and CD7. Significance was assessed using 2-tailed Wilcoxon’s signed-rank sum test (paired data) or a 2-tailed Mann-Whitney U test (unpaired data) with P values less than 0.05 considered significant. Source Data are provided as a Source Data file.

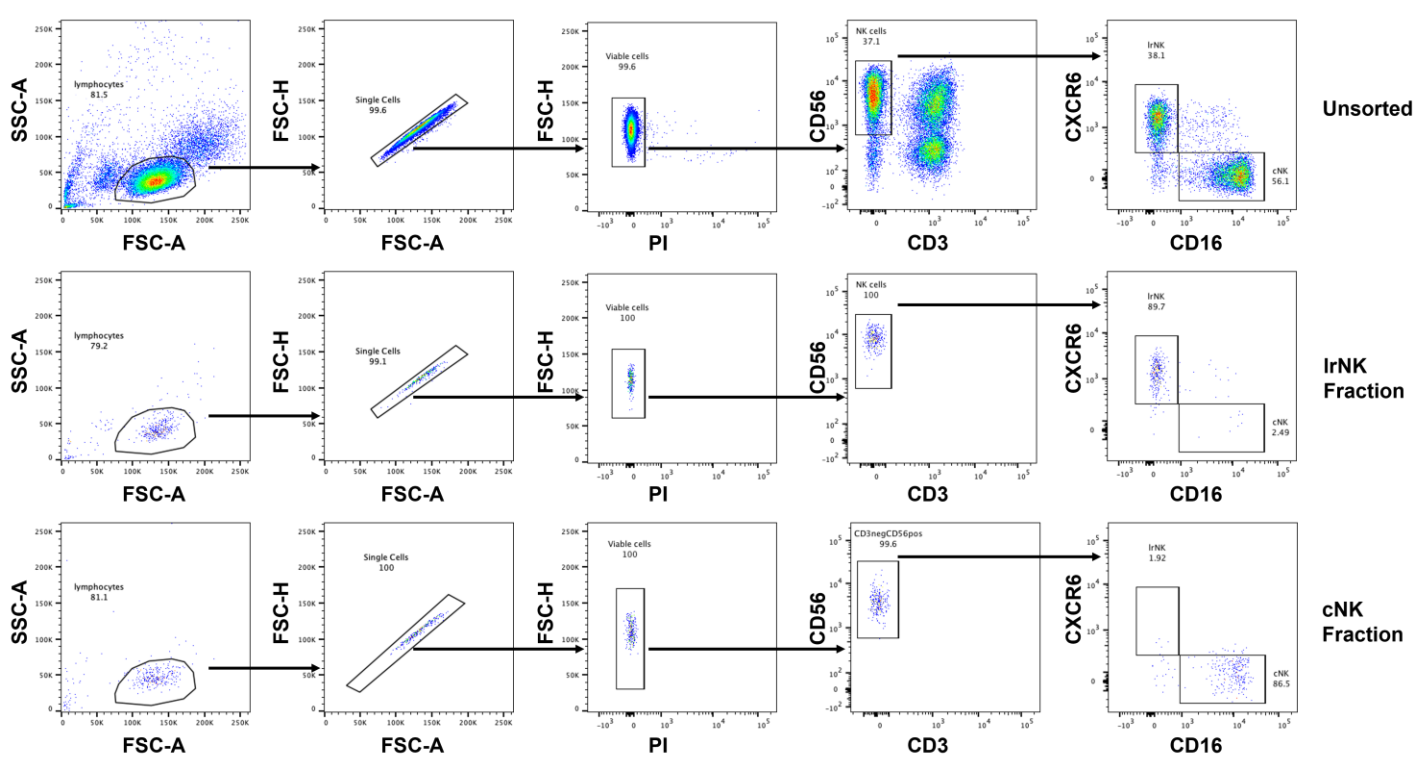

**Figure S4. Gating strategy of sorted NK cell fractions from liver perfusates for use in functional assays.** NK cells were separated from liver perfusates into cNK (CXCR6-CD16+) and LrNK (CXCR6+CD16) cell fractions by FACS. (Top) Unsorted lymphocyte fractions within perfusate. (Middle) Sorted LrNK cell fraction. (Bottom) Sorted cNK cell fraction.

a.

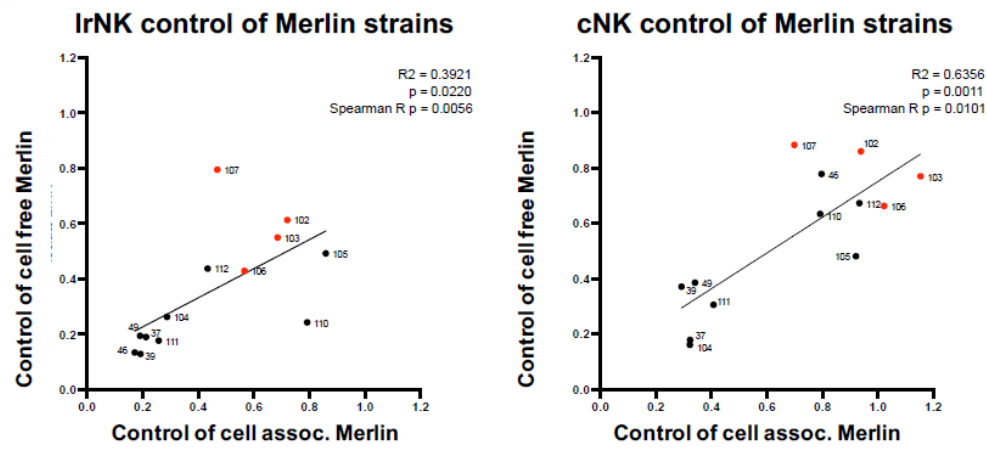

b.

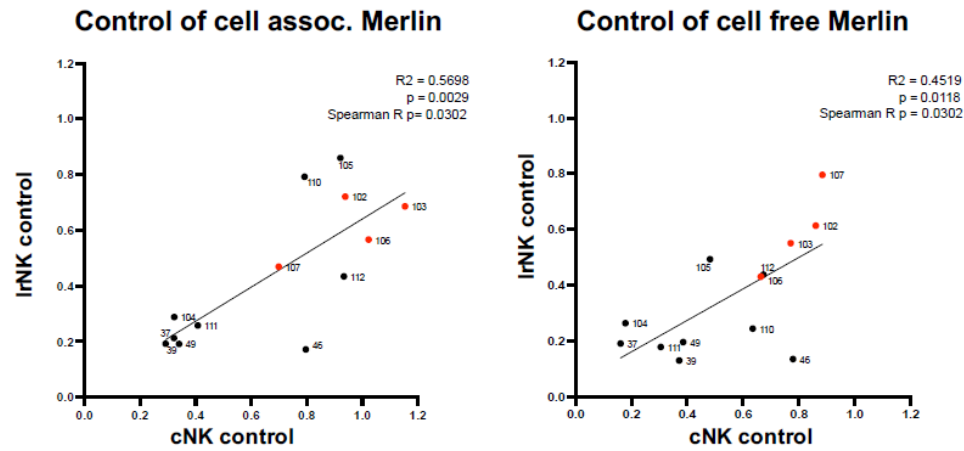

**Figure S5. Correlation of NK cell mediated control between NK cell subsets and between HCMV strains.** Data from virus spread assays plotted to assess correlation. HCMV seropositive donors (black; n= 9) and seronegative (red; n= 4) are plotted together. (a) Correlation between IrNK (left) and cNK (right) control of cell assoc. Merlin and cell free merlin. (b) Correlation between IrNK and cNK control of cell assoc. Merlin (left) and cell free merlin (right). Significance was assessed using linear regression analysis and Spearman’s Rank correlation with P values less than 0.05 considered significant. Source Data are provided as a Source Data file.

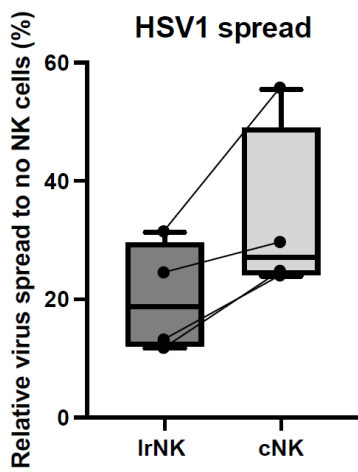

**Fig S6. lrNK cells control HSV-1 replication in vitro.** Seeded fibroblasts were infected with HSV-1 at ~0.01 MOI/well with sorted cNK or lrNK from donor perfusates (individual donors n=4) added after 6hrs. After a further 3days, cultures were fixed and immunostained for DAPI and HSV-1 ICP4 (secondary antibody on AF568). Immunostained plates were analysed on a Hermes Wiscan scanning microscope with MetaMorph imaging software. Data are shown as box and whisker plots showing line at median and min and max data points. Experiments were run once for each donor. Significance was not calculated due to limited sample size. Source Data are provided as a Source Data file.

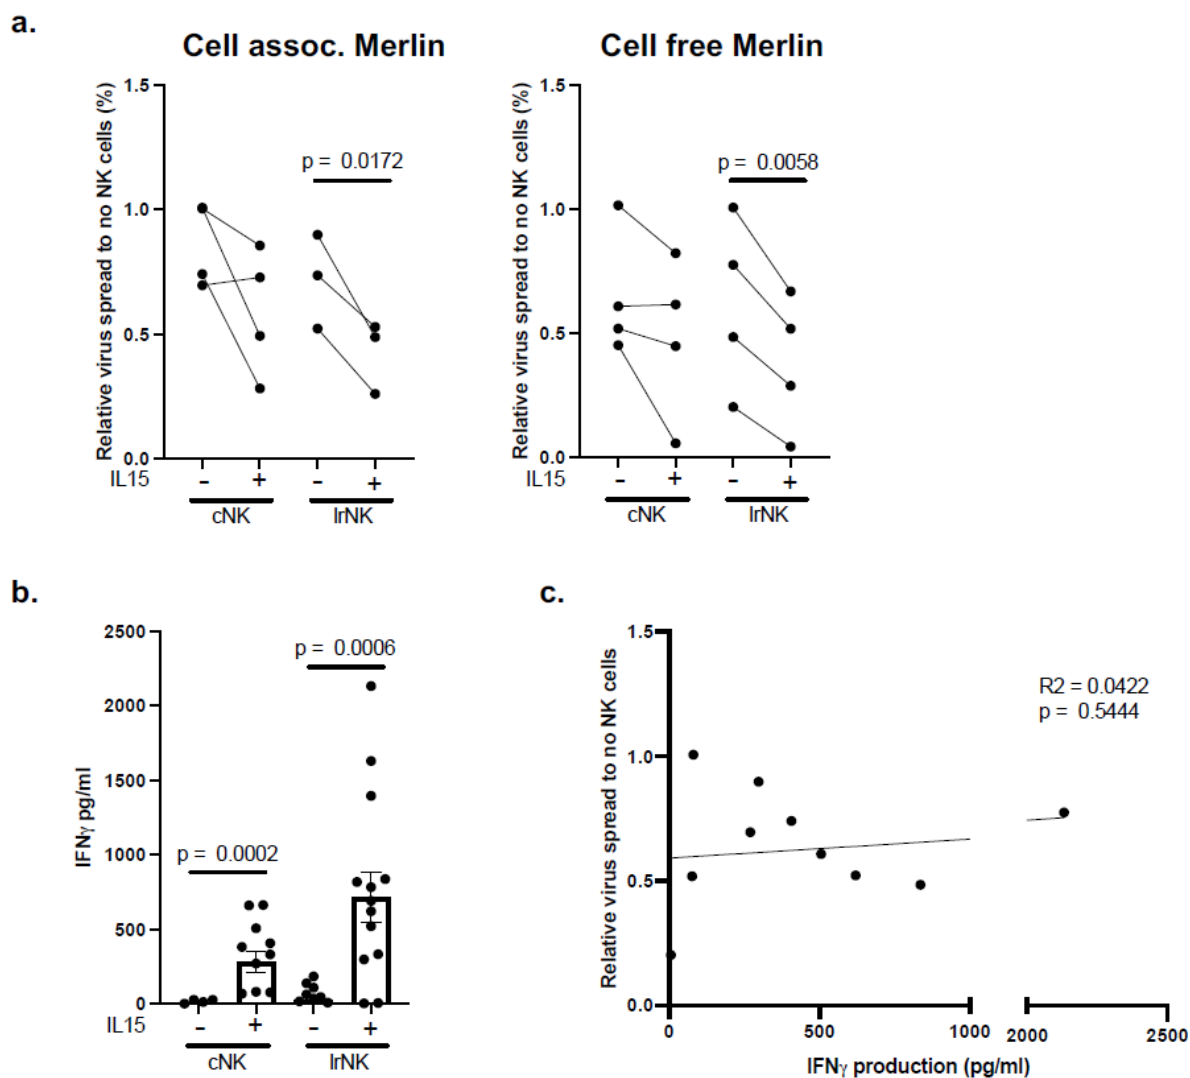

**Fig S7. IL15 induced production of IFN $\gamma$  is not associated with control.** (a) cNK and lrNK were cultured with HCMV infected HFF alone or in the presence of 10ng/ml human recombinant IL15 (individual donors: cell assoc. cNK n= 4, lrNK n=3; cell free cNK n=4, lrNK n=4). (b) Culture supernatants were assessed for NK cell production of IFN $\gamma$  by ELISA (paired replicates cNK vs cNK + IL15 n=12; lrNK vs lrNK + IL15 n=14) with data presented as mean values  $\pm$  SEM, and (c) levels of IFN $\gamma$  were plotted against in vitro control (individual replicates n= 11). To determine the effects of IL-15 (a,b) we analysed the data using a repeated measures approach. Since repeated measures ANOVA cannot handle missing values, we fitted a mixed model, which uses a compound symmetry covariance matrix and is fitted using Restricted Maximum Likelihood (REML). Since measures were paired, rather than repeated, we assumed sphericity., (b) 2-tailed Wilcoxon's signed-rank sum test (paired data), or (c) linear regression analysis. Experiments were run once for each donor. P values less than 0.05 considered significant. Source Data are provided as a Source Data file.

a.

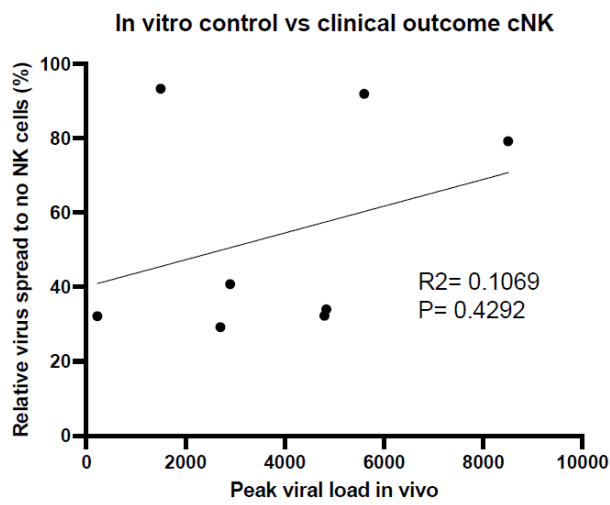

b.

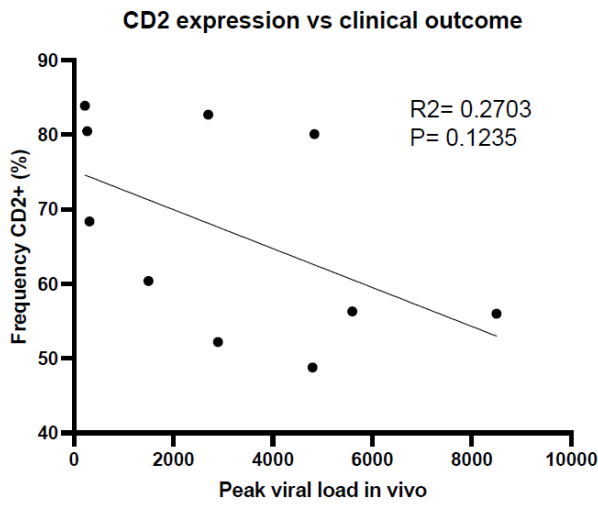

**Figure S8. A trend was observed between cNK cells and post-transplant outcome.** Peak viral load (genome copies/ml blood) within one year post-transplant in all transplant recipients who received a liver from a HCMV-seropositive donor is plotted against (a) *in vitro* control of HCMV spread by cNK cells (black; n= 8) or (b) frequency of CD2+ cNK cells (red: n=10) isolated from the donor liver prior to transplant. Significance was assessed using linear regression analysis. Source Data are provided as a Source Data file.



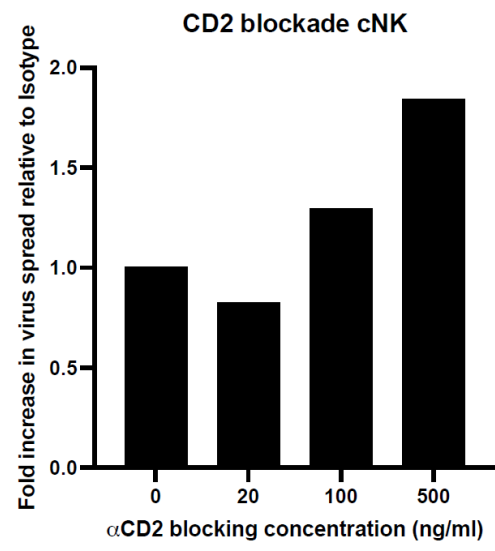

**Figure S9. CD2 blockade inhibits control of HCMV infection by cNK cells.** FACS sorted CD2+ cNK cells were blocked with aCD2 antibody or isotype control and then analysed for in vitro control of cell assoc. Merlin in a virus dissemination assay (n=1; in duplicate). Source Data are provided as a Source Data file.

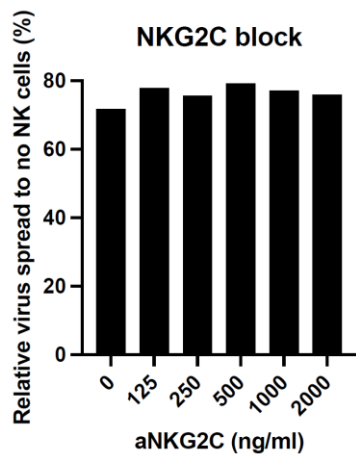

**Figure S10. NKG2C blockade does not inhibit control of HCMV infection by cNK cells.** FACS sorted NKG2C+ cNK cells were blocked with aNKG2C antibody or isotype control and then analysed for in vitro control of cell assoc. Merlin in a virus dissemination assay (n=1; in duplicate). Source Data are provided as a Source Data file.

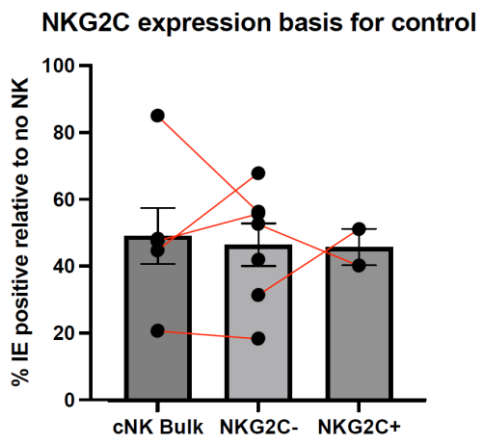

**Figure S11. NKG2C+ and NKG2C- cNK cells control HCMV replication equally well.** Bulk cNK cells (individual donor n=5) or cNK cells separated into NKG2C+ (individual donor n=7) and NKG2C- (individual donor n=2) fractions were analysed for their ability to control HCMV strain Merlin in a virus dissemination assay. Data are presented as mean values  $\pm$  SEM. Experiments were run once for each donor. Significance was assessed using a 2-tailed Mann-Whitney U test. Source Data are provided as a Source Data file.

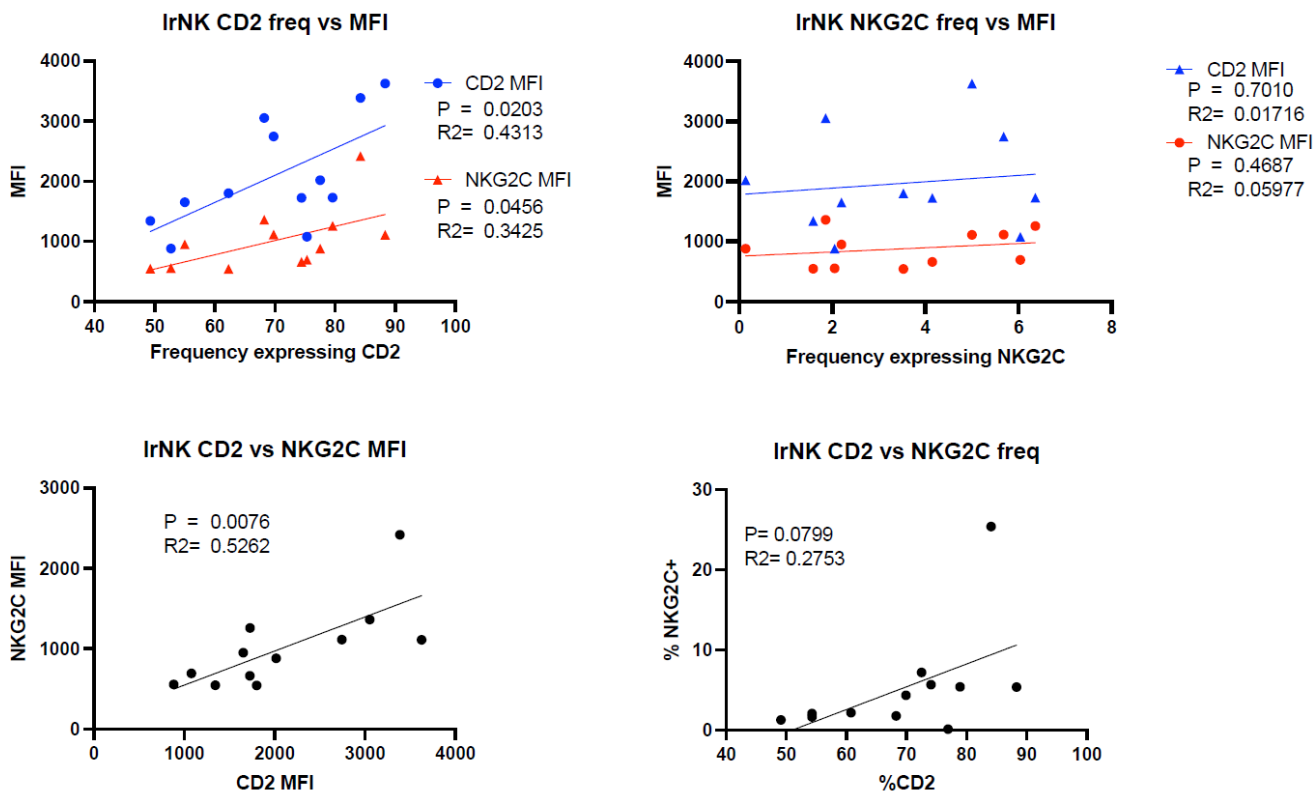

**Figure S12. Association of NKG2C and CD2 expression by IrNK cells.** Phenotypic analysis of NKG2C and CD2 expression on IrNK cells measured through frequency of positive cells or MFI. One donor perfusate was removed from top right graph due to outlying frequency of NKG2C+ IrNK cells (28.4% vs mean 3.51%). Significance was assessed using linear regression analysis. Source Data are provided as a Source Data file.

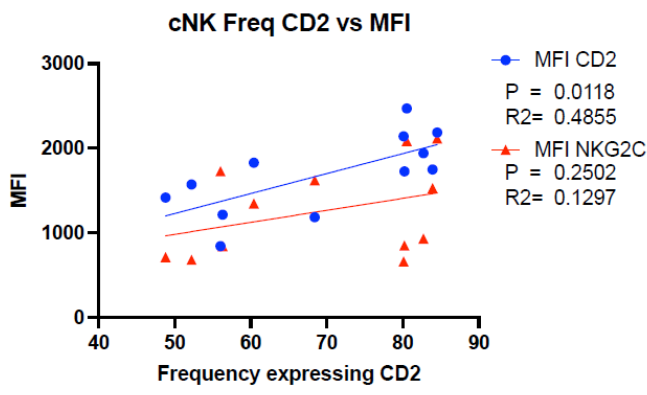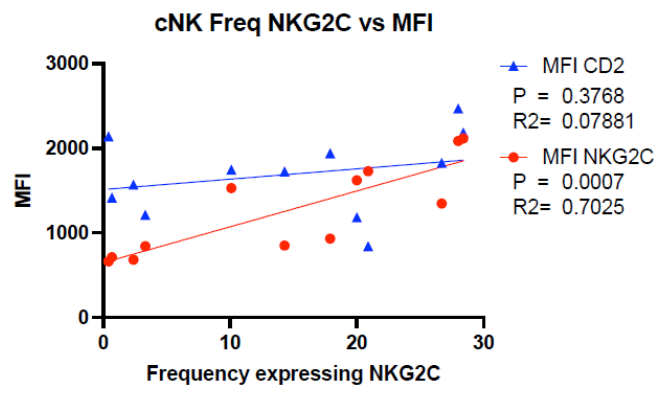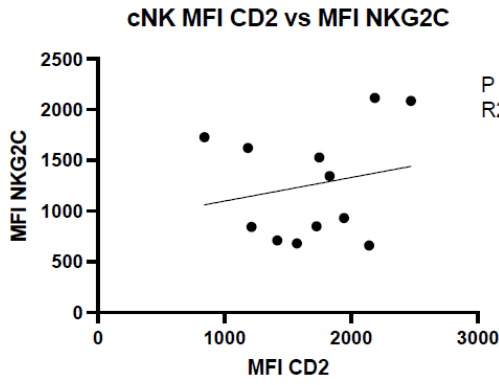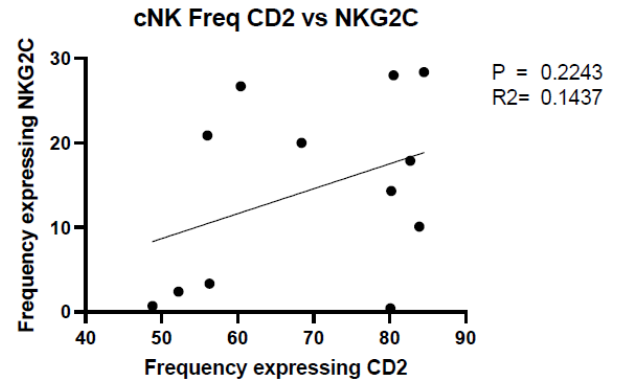

**Figure S13. Association of NKG2C and CD2 expression by cNK cells.** Phenotypic analysis of NKG2C and CD2 expression on cNK cells measured through frequency of positive cells or MFI. Significance was assessed using linear regression analysis. Source Data are provided as a Source Data file.

| Freq (%) | Cell assoc. Merlin | HCMV+  | HCMV-  |            | Freq (%) | Cell free Merlin | HCMV+  | HCMV-  |            |
|----------|--------------------|--------|--------|------------|----------|------------------|--------|--------|------------|
| cNK      | NKG2A              | 0.9282 | 0.1045 | neg. assoc | cNK      | NKG2A            | 0.6759 | 0.2392 | neg. assoc |
|          | Siglec7            | 0.5281 | 0.0516 |            |          | Siglec7          | 0.7321 | 0.1396 |            |
|          | FcεRly             | 0.6141 | 0.1125 |            |          | FcεRly           | 0.8909 | 0.4793 |            |
|          | NKG2C              | 0.0847 | 0.5888 | NKG2C      |          | 0.0084           | 0.6988 |        |            |
|          | CD2                | 0.4788 | 0.9392 | CD2        |          | 0.8424           | 0.9949 |        |            |
|          | CD57               | 0.2087 | 0.7988 | CD57       |          | 0.4219           | 0.889  |        |            |
| IrNK     | NKG2A              | 0.3788 | 0.0628 | neg. assoc | IrNK     | NKG2A            | 0.1565 | 0.7905 | neg. assoc |
|          | Siglec7            | 0.2105 | 0.5584 |            |          | Siglec7          | 0.0317 | 0.2933 |            |
|          | FcεRly             | 0.4355 | 0.4055 |            |          | FcεRly           | 0.7798 | 0.9228 |            |
|          | NKG2C              | 0.3679 | 0.1939 | NKG2C      |          | 0.2817           | 0.9367 |        |            |
|          | CD2                | 0.0462 | 0.1442 | CD2        |          | 0.129            | 0.9367 |        |            |
|          | CD57               | 0.1308 | 0.8307 | CD57       |          | 0.3588           | 0.2257 |        |            |

| MFI  | Cell assoc. Merlin | HCMV+  | HCMV-  |            | MFI  | Cell free Merlin | HCMV+  | HCMV-  |            |
|------|--------------------|--------|--------|------------|------|------------------|--------|--------|------------|
| cNK  | CD57               | 0.9654 | 0.6027 | neg. assoc | cNK  | CD57             | 0.6058 | 0.8971 | neg. assoc |
|      | NKG2A              | 0.3018 | 0.4717 |            |      | NKG2A            | 0.8977 | 0.6851 |            |
|      | NKG2C              | 0.1052 | 0.7769 |            |      | NKG2C            | 0.1084 | 0.527  |            |
|      | Siglec7            | 0.714  | 0.0396 |            |      | Siglec7          | 0.7303 | 0.2804 |            |
|      | CD7                | 0.788  | 0.2824 |            |      | CD7              | 0.7431 | 0.0518 |            |
|      | FcεRly             | 0.942  | 0.8407 |            |      | FcεRly           | 0.5193 | 0.3734 |            |
|      | CD2                | 0.4407 | 0.4891 |            |      | CD2              | 0.8794 | 0.7941 |            |
| IrNK | CD57               | 0.9289 | 0.5167 |            | IrNK | CD57             | 0.6912 | 0.9636 |            |
|      | NKG2A              | 0.1128 | 0.7774 |            |      | NKG2A            | 0.3005 | 0.813  |            |
|      | NKG2C              | 0.7652 | 0.6159 |            |      | NKG2C            | 0.8668 | 0.4154 |            |
|      | Siglec7            | 0.5269 | 0.736  |            |      | Siglec7          | 0.0529 | 0.8924 |            |
|      | CD7                | 0.3087 | 0.2369 |            |      | CD7              | 0.4884 | 0.0936 |            |
|      | FcεRly             | 0.6289 | 0.2267 |            |      | FcεRly           | 0.3174 | 0.6344 |            |
|      | CD2                | 0.1027 | 0.7983 |            |      | CD2              | 0.4908 | 0.4433 |            |

Linear Regression P value

<0.05

<0.1

**Table S1. Association of NK cell phenotypic markers with in vitro control of HCMV.** Expression frequency and MFI expression of NK cell markers CD57, CD2, FcεRly, Siglec7, NKG2C, NKG2A and CD7 were assessed for association with in vitro control of HCMV. Positive or negative association is indicated on relevant rows. Significance was assessed using linear regression analysis (p=<0.05 green, <0.1 yellow).
